Title

Association of Vitamin D deficiency and vitamin D receptor gene polymorphisms with type 1 diabetes risk: A South Indian familial study

Ramasamy Thirunavukkarasu<sup>1</sup>, Ayyappan Chitra<sup>2</sup>, Arthur Asirvatham<sup>3</sup>, Mariakuttikan

Jayalakshmi <sup>1\*</sup>

<sup>1</sup> Dept. of Immunology, School of Biological Sciences, Madurai Kamaraj University, Madurai, India.

<sup>2</sup> Institute of Child Health and Research Centre, Govt. Rajaji Hospital, Madurai, India.

<sup>3</sup> Dept. of Diabetology, Govt. Rajaji Hospital, Madurai, India.

"The authors have withdrawn their manuscript because they identified errors in the vitamin D levels and VDR gene polymorphisms section. Therefore, the authors do not wish this work to be cited as reference for the project. If you have any questions, please contact the corresponding author."
